# Supplementary material
Source: PubMed Central journal article supplement (PMC5994366)

**APOE ++**

*(two e4 alleles)*

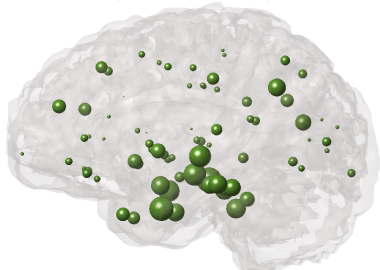

**APOE --**

*(no e4 alleles)*

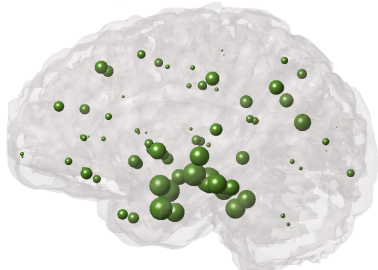

**APOE +-**

*(one e4 alleles)*

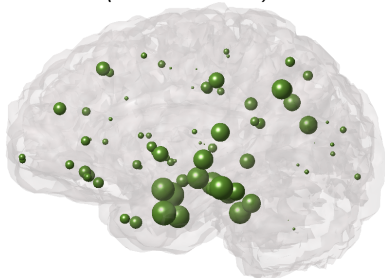

**APOE ++/+-**

*(at least one e4 allele)*

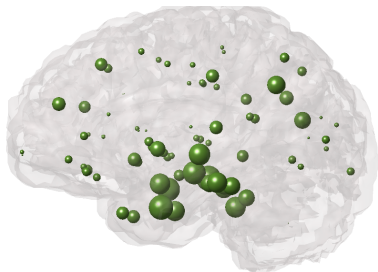

Supplement: NIHMS928840-supplement-1.pdf [file NIHMS928840-supplement-1.pdf]
